# Supplementary material for: Organic heterojunction charge-transfer chemical sensors
Source: Royal Society of Chemistry journal article supplement (doi:10.1039/d3tc03695b), 2024-01-01
Supplement: d3tc03695b1.pdf [file d3tc03695b1.pdf]

## Supplementary information

### Organic Heterojunction Charge-Transfer Chemical Sensors

Marc Courté,<sup>a\*</sup> Anderson Hoff,<sup>b</sup> Gregory C. Welch,<sup>b</sup> Loren G. Kaake<sup>a\*</sup>

<sup>a</sup> Department of Chemistry, Simon Fraser University, Vancouver, British Columbia, Canada, V5A 1S6

<sup>b</sup> Department of Chemistry, University of Calgary, 2500 University Drive N.W., Calgary, Alberta, Canada, T2N 1N4

|                                                                                                     |    |
|-----------------------------------------------------------------------------------------------------|----|
| Figure S1. I-V curve response of PDI-NH doped P(NDI2OD-2T) films                                    | S2 |
| Figure S2. I-V curve response of PDI-NH doped P(NDI2OD-2T) films after exposure to butylamine vapor | S2 |
| Figure S3. Repeated response/recovery of the sensor exposed to n-butylamine vapor                   | S3 |
| Figure S4: Stability performance of PDI-NH doped P(NDI2OD-2T) films                                 | S3 |
| Figure S5. Atomic Force spectroscopy (AFM) images of P(NDI2OD-2T) films                             | S4 |
| Figure S6. Cadaverine sensitivity response of PDI-NH doped P(NDI2OD-2T) films                       | S4 |
| Table S1. OFET characteristics                                                                      | S5 |
| Figure S7. Thickness measurement of a representative PDI-NH doped P(NDI2OD-2T) film                 | S5 |
| Figure S8. UV-Visible spectra of PDI-NH doped P(NDI2OD-2T) films                                    | S6 |
| Figure S9. NOVEC 7100 sensitivity response of PDI-NH doped P(NDI2OD-2T) film                        | S6 |
| Table S2. Comparison with recently reported ammonia/amine sensors                                   | S7 |
| Figure S10. UV-Vis of PDI-NH doped P(NDI2OD-2T) film treated with butylamine                        | S8 |
| References                                                                                          | S9 |

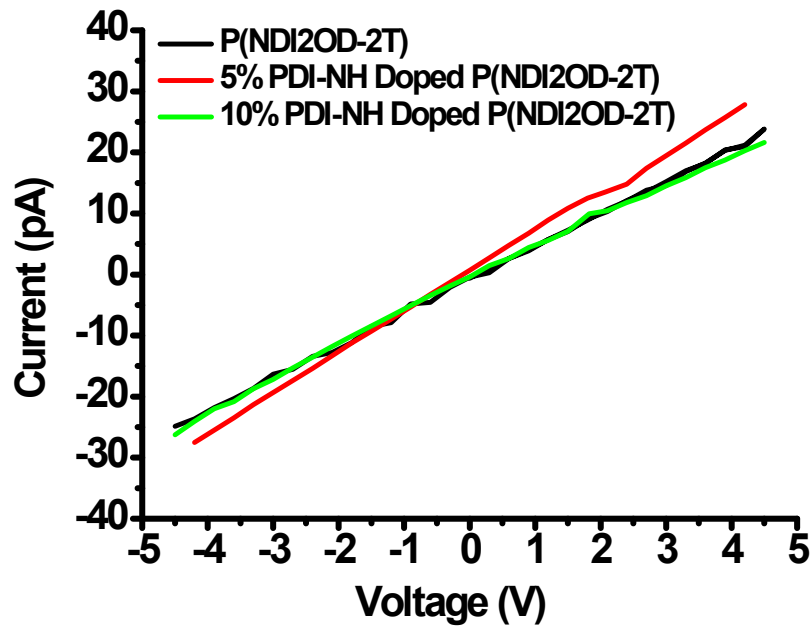

**Figure S1.** I-V curve response of P(NDI2OD-2T) films with different doping concentration in PDI-NH.

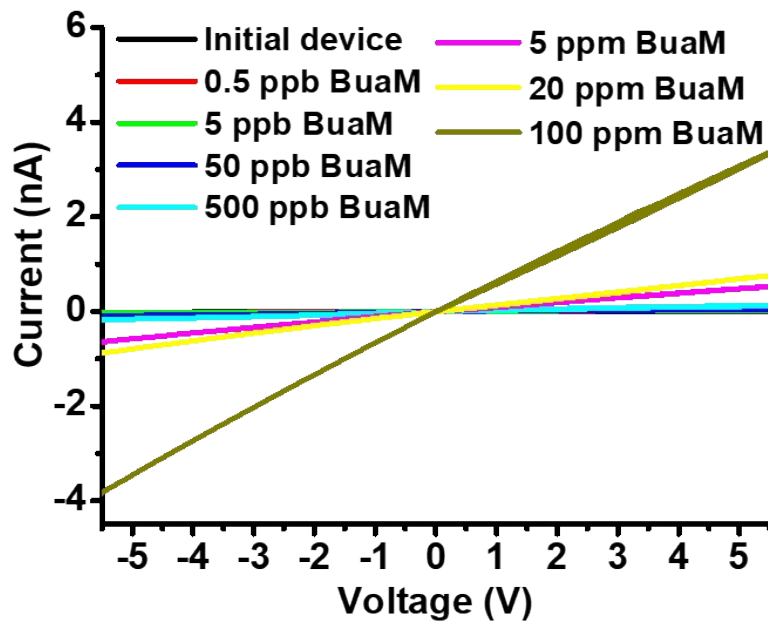

**Figure S2.** I-V curve response of P(NDI2OD-2T) films after exposure to different concentration (0.5 ppb – 100 ppm) of n-butylamine vapor.

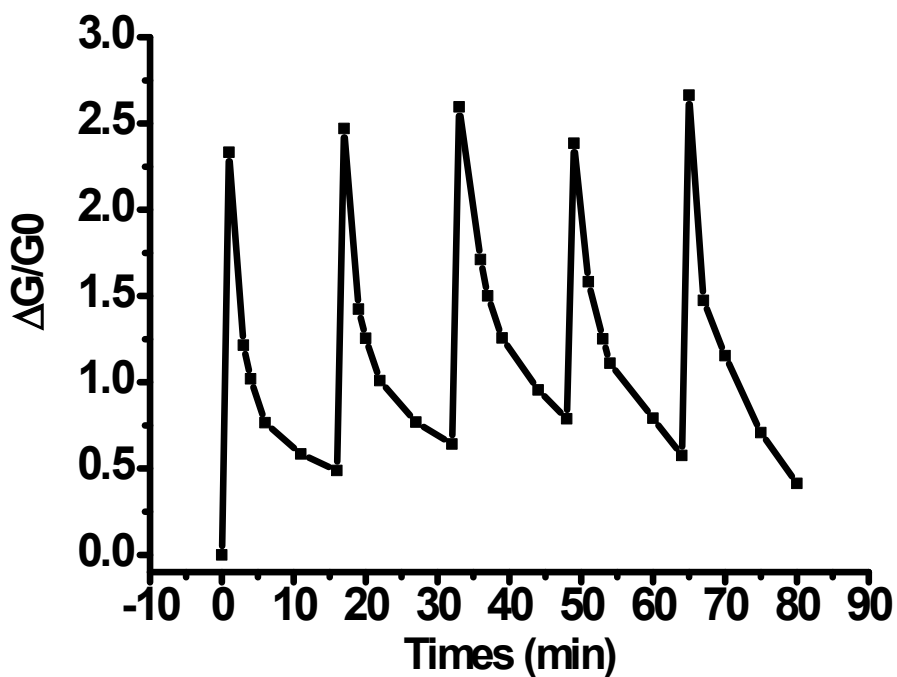

**Figure S3.** Repeated response/recovery of the PDI-NH doped P(NDI2OD-2T) film exposed to 0.5 ppm of n-butylamine.

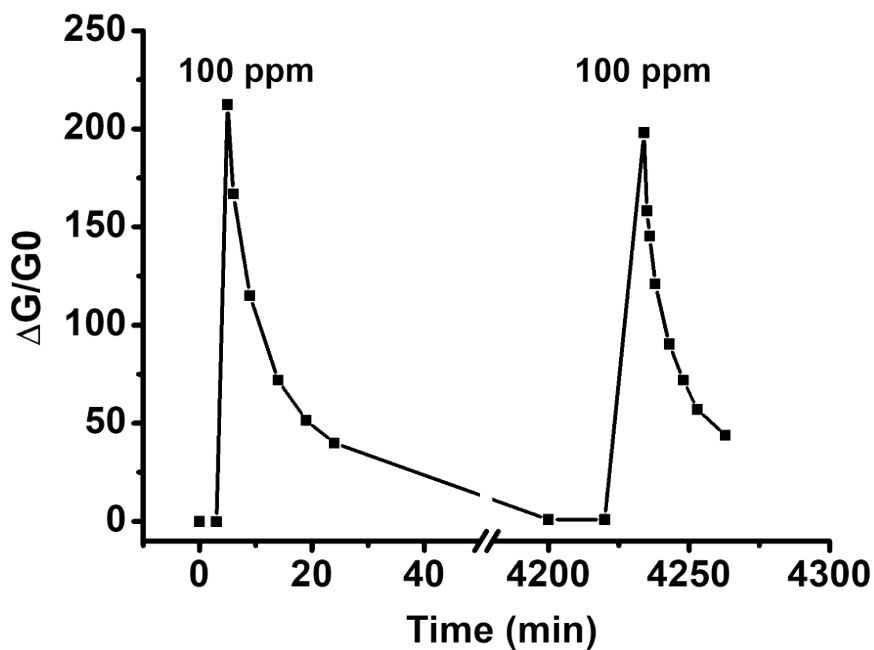

**Figure S4:** Stability performance of the PDI-NH doped P(NDI2OD-2T) film over days when exposed to 100 ppm of n-butylamine

## P(NDI2OD-2T)

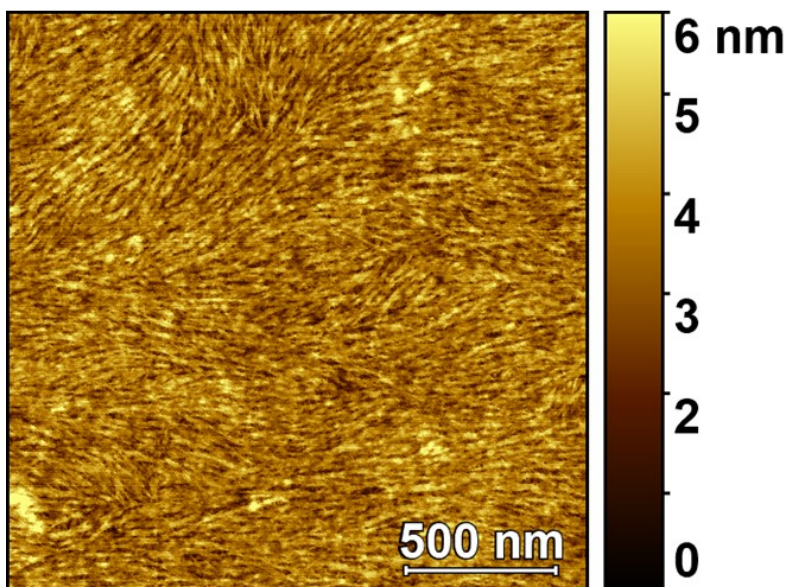

**Figure S5.** Atomic Force spectroscopy (AFM) images ( $2\ \mu\text{m} \times 2\ \mu\text{m}$ ) of P(NDI2OD-2T) films deposited by spin-coating on glass substrates.

## Cadaverine

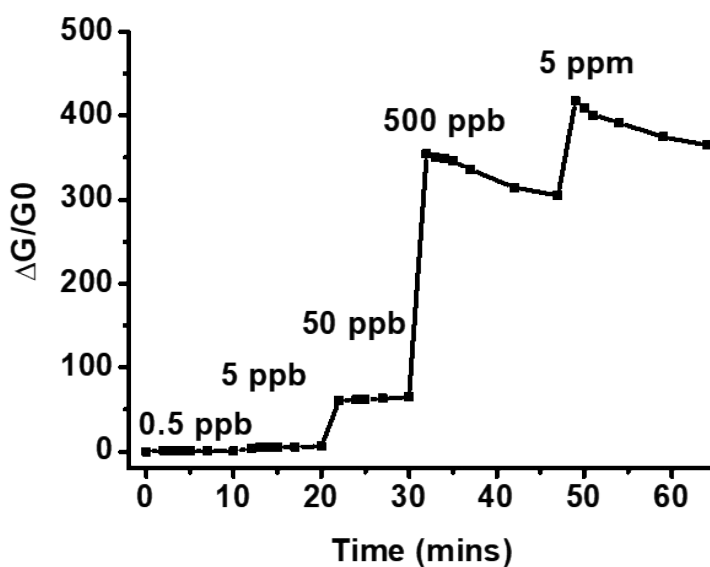

**Figure S6.** Sensitivity response of PDI-NH doped P(NDI2OD-2T) film after exposure to different concentration (0.5 ppb – 5 ppm) of cadaverine.

**Table S1.** Summary of the different OFET characteristics of PDI-NH doped P(NDI2OD-2T) film before and after exposure to Butylamine vapor

| Samples            | Before exposure to 5 ppm Butylamine                     |                       |                    | After exposure to 5 ppm Butylamine                      |                       |                   |
|--------------------|---------------------------------------------------------|-----------------------|--------------------|---------------------------------------------------------|-----------------------|-------------------|
|                    | Electron mobility $\text{cm}^2/(\text{V}\cdot\text{s})$ | Threshold Voltage (V) | On/Off ratio       | Electron mobility $\text{cm}^2/(\text{V}\cdot\text{s})$ | Threshold Voltage (V) | On/Off ratio      |
| N2200              | 0.005                                                   | 21.2                  | $4.0 \times 10^4$  | 0.007                                                   | 1.3                   | $4. \times 10^4$  |
| PDI-NH doped N2200 | 0.008                                                   | 8.6                   | $2.8. \times 10^5$ | 0.01                                                    | -2.0                  | $6.1 \times 10^4$ |

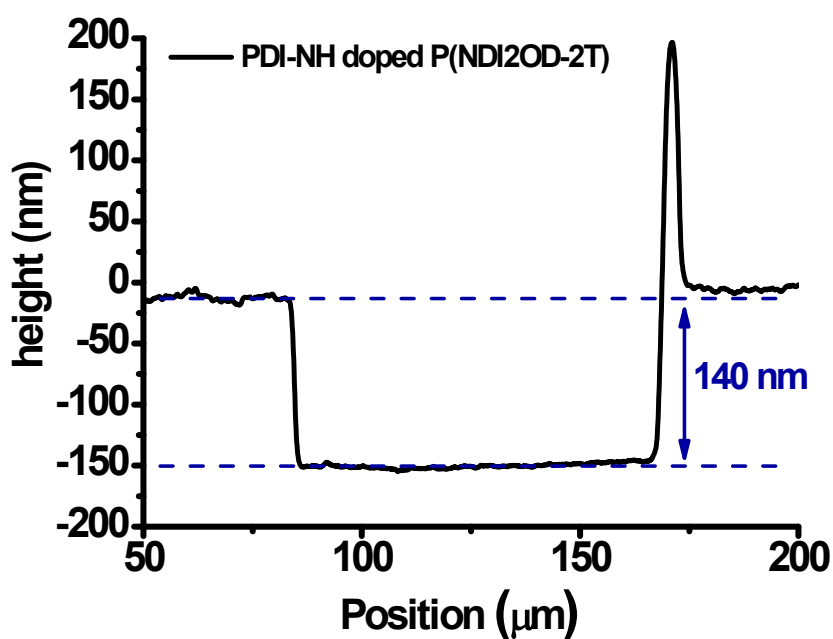

**Figure S7.** Profilometry thickness measurement of PDI-NH doped P(NDI2OD-2T) film deposited by spin-coating on a glass substrate.

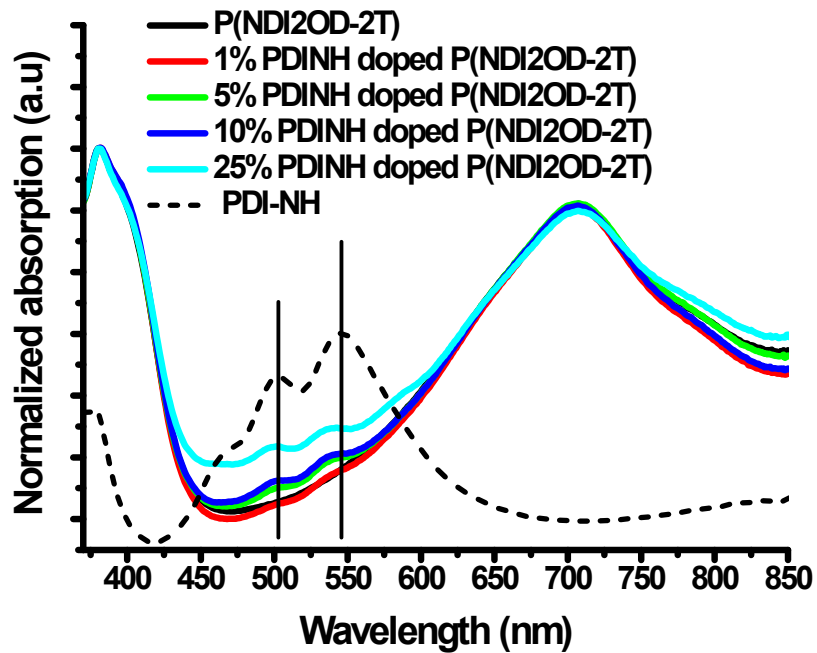

**Figure S8.** UV-Vis spectra of PDI-NH doped P(NDI2OD-2T) films for various doping concentration (straight line) and pristine PDI-NH (dot line) deposited by spin-coating on a glass substrate.

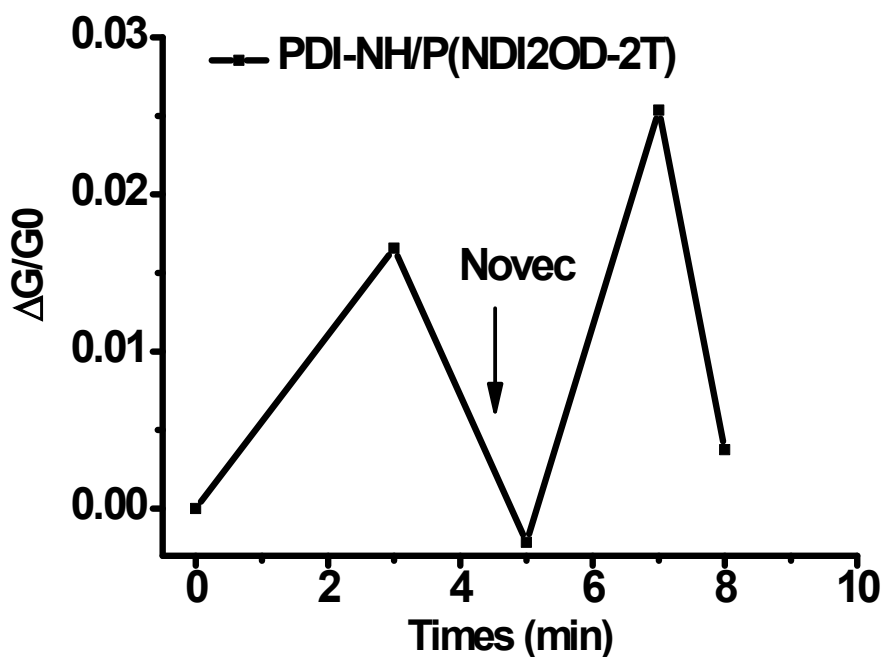

**Figure S9.** Sensitivity response of PDI-NH doped P(NDI2OD-2T) film after exposure to 0.5 mL of NOVEC.

**Table S2.** Comparison with recently reported ammonia/amine sensors.

| Sensing material                           | Configuration/type | Analyte        | Concentration in analyte | Sensing response (%) | Ref. |
|--------------------------------------------|--------------------|----------------|--------------------------|----------------------|------|
| <b>Our work</b>                            | Chemiresistor      | Butylamine     | <b>5 ppm</b>             | <b>3 670</b>         |      |
|                                            |                    | Cadaverine     | <b>5 ppm</b>             | <b>66 500</b>        |      |
| WO <sub>3</sub> -SnO <sub>2</sub>          | Chemiresistor      | Ammonia        | 400 ppm                  | 3 500                | 1    |
| ZnO/PANI                                   | Chemiresistor      | Ammonia        | 10 ppm                   | 2 150                | 2    |
|                                            |                    | Butylamine     | 10 ppm                   | 30                   |      |
| PANI                                       | Chemiresistor      | Ammonia        | 10 ppm                   | 220                  | 2    |
| SnO <sub>2</sub> /ZnO NW                   | Chemiresistor      | Butylamine     | 10 ppm                   | 720                  | 3    |
| Sensitized TiO <sub>2</sub>                | Chemiresistor      | Methylamine    | 10 ppm                   | 11.3                 | 4    |
| Pd decorated ZnO                           | Chemiresistor      | Methylamine    | 100 ppm                  | 99.5                 | 5    |
| {SiO <sub>2</sub> :ZnO/3,5-dinitrophenyls} | Chemiresistor      | Butylamine     | 50 ppm                   | 90                   | 6    |
| SWCNTs metalloporphyrin                    | Chemiresistor      | Ammonia        | 5 ppm                    | 4                    | 7    |
|                                            |                    | Cadaverine     | 2.5 ppm                  | 10                   |      |
|                                            |                    | Putrescine     | 2.5 ppm                  | 10                   |      |
| PDI-HIS                                    | Chemiresistor      | Ammonia        | 50 ppm                   | 1 700                | 8    |
| PTTEH                                      | OFET               | Ammonia        | 10 ppm                   | 30                   | 9    |
| P3HT                                       | Chemiresistor      | Ammonia        | 500 ppb                  | 34                   | 10   |
|                                            |                    | Dimethylamine  | 500 ppb                  | 18                   |      |
|                                            |                    | Trimethylamine | 500 ppb                  | 10                   |      |
| Cu <sub>3</sub> (HHTP) <sub>2</sub> MOF    | Chemiresistor      | Ammonia        | 100 ppm                  | 129                  | 11   |
| CuTHPP-MOF                                 | Chemiresistor      | Cadaverine     | 0.1 μL                   | 10                   | 12   |
| NDI(2OD)(4tBuPh)-DTYM2                     | OFET               | Ammonia        | 100 ppm                  | 20                   | 13   |
| DTBDT-C6                                   | OFET               | Ammonia        | 10 ppm                   | 30                   | 14   |
| PTS-Pani                                   | Chemiresistor      | Ammonia        | 5 ppm                    | 225                  | 15   |
|                                            |                    | Cadaverine     | 5 ppm                    | 46                   |      |
|                                            |                    | Putrescine     | 5 ppm                    | 17                   |      |
| SWCNT-N-C6F4CO <sub>2</sub> H              | Chemiresistor      | Ammonia        | 40 ppm                   | 10.8                 | 16   |
|                                            |                    | Trimethylamine | 40 ppm                   | 9.3                  |      |
| graphene-encased gold nanorod              | Nanoplasmonic      | Cadaverine     | 0.1 mM                   | 100                  | 17   |

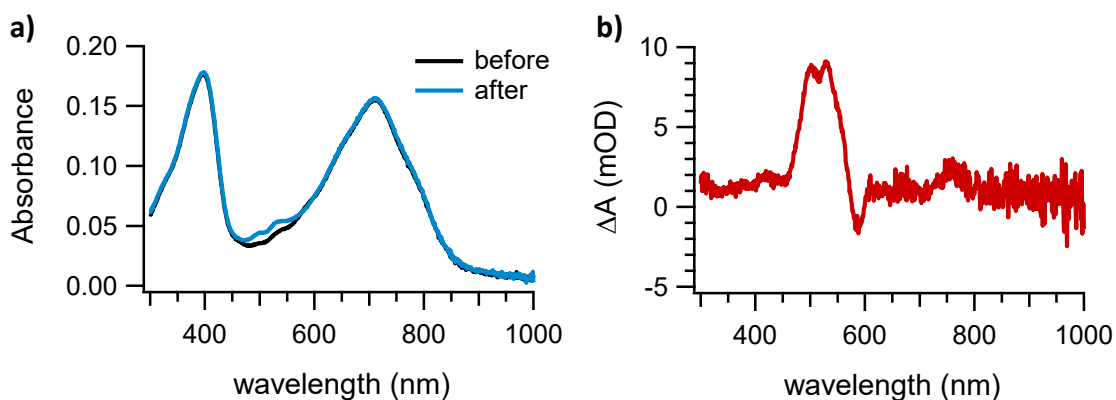

**Figure S10.** UV-Vis spectra of PDI-NH doped P(NDI2OD-2T) film treated with butylamine. a) before and after treatment with butylamine. b) calculated difference spectrum.

The absorbance spectra in fig. S10a are dominated by features associated P(NDI2OD-2T). Upon treatment with butylamine, a subtle increase in absorbance occurs around approximately 510 nm. Subtracting the spectrum before amine treatment from the spectrum after treatment yields the difference spectrum in S10b. Positive going features indicate species not in the spectrum before amine treatment. Most notable is a peak near 510 nm, consistent with electron transfer from the PDIN anion to P(NDI2OD-2T). The peak at 510 nm does not correspond to PDIN anion,<sup>18</sup> but the singly charged anion of P(NDI2OD-2T).<sup>19</sup> Additional structure from the bleached PDINH absorbance is superimposed on the P(NDI2OD-2T) anion. The bleach of neutral P(NDI2OD-2T) features is not clearly apparent, presumably because overlap with PDIN.



## References

- 1 A. K. Nayak, R. Ghosh, S. Santra, P. K. Guha and D. Pradhan, *Nanoscale*, **2015**, 7, 12460–12473.
- 2 Y. Li, M. Jiao, H. Zhao and M. Yang, *Sensors and Actuators B: Chemical*, **2018**, 264, 285–295.
- 3 L. Wang, J. Li, Y. Wang, K. Yu, X. Tang, Y. Zhang, S. Wang and C. Wei, *Sci Rep*, **2016**, 6, 35079.
- 4 L. Yanxiao, Z. Xiao-bo, H. Xiao-wei, S. Ji-yong, Z. Jie-wen, M. Holmes and L. Hao, *Biosensors and Bioelectronics*, **2015**, 67, 35–41.
- 5 J. Bruce, K. Bosnick and E. Kamali Heidari, *Sensors and Actuators B: Chemical*, **2022**, 355, 131316.
- 6 R. S. Andre, Q. P. Ngo, L. Fugikawa-Santos, D. S. Correa and T. M. Swager, *ACS Sens.*, **2021**, 6, 2457–2464.
- 7 S. F. Liu, A. R. Petty, G. T. Sazama and T. M. Swager, *Angewandte Chemie International Edition*, **2015**, 54, 6554–6557.
- 8 A. Kalita, S. Hussain, A. H. Malik, N. V. V. Subbarao and P. K. Iyer, *J. Mater. Chem. C*, **2015**, 3, 10767–10774.
- 9 Z. Wang, Z. Liu, L. Chen, Y. Yang, J. Ma, X. Zhang, Y. Guo, G. Zhang and D. Zhang, *Advanced Electronic Materials*, **2018**, 4, 1800025.
- 10 L.-Y. Chang, M.-Y. Chuang, H.-W. Zan, H.-F. Meng, C.-J. Lu, P.-H. Yeh and J.-N. Chen, *ACS Sens.*, **2017**, 2, 531–539.
- 11 M.-S. Yao, X.-J. Lv, Z.-H. Fu, W.-H. Li, W.-H. Deng, G.-D. Wu and G. Xu, *Angewandte Chemie International Edition*, **2017**, 56, 16510–16514.
- 12 S. Zhang, L. Li, Y. Lu, J. Zhang, D. Liu, D. Hao, X. Zhang, L. Tian, L. Xiong and J. Huang, *J. Mater. Chem. C*, **2022**, 10, 5497–5504.
- 13 F. Zhang, C. Di, N. Berdunov, Y. Hu, Y. Hu, X. Gao, Q. Meng, H. Siringhaus and D. Zhu, *Advanced Materials*, **2013**, 25, 1401–1407.
- 14 L. Li, P. Gao, M. Baumgarten, K. Müllen, N. Lu, H. Fuchs and L. Chi, *Advanced Materials*, **2013**, 25, 3419–3425.
- 15 Z. Ma, P. Chen, W. Cheng, K. Yan, L. Pan, Y. Shi and G. Yu, *Nano Lett.*, **2018**, 18, 4570–4575.
- 16 C. Paoletti, M. He, P. Salvo, B. Melai, N. Calisi, M. Mannini, B. Cortigiani, F. G. Bellagambi, T. M. Swager, F. Di Francesco and A. Pucci, *RSC Adv.*, **2018**, 8, 5578–5585.
- 17 K. H. Kim, S. Jo, S. E. Seo, J. Kim, D.-S. Lee, S. Joo, J. Lee, H. S. Song, H. G. Lee and O. S. Kwon, *ACS Sens.*, **2023**, 8, 2169–2178.
- 18 C. R. Harding, J. Cann, A. Laventure, M. Sadeghianlemraski, M. Abd-Ellah, K. R. Rao, B. S. Gelfand, H. Aziz, L. Kaake, C. Risko and G. C. Welch, *Materials Horizons*, **2020**, 7, 2959–2969.
- 19 D. Trefz, A. Ruff, R. Tkachoy, M. Wieland, M. Goll, A. Kiriya and S. Ludwigs, *J. Phys. Chem. C*, **2015**, 119, 22760–22771.
